# Supplementary material
Source: PubMed Central journal article supplement (PMC8782564)
Supplement: NIHMS1761289-supplement-Supp_Fig_2.pdf [file NIHMS1761289-supplement-Supp_Fig_2.pdf]

**Supplemental Figure II: Comparison of Observed Survival in Idiopathic, Familial, and Anorexigen-Associated PAH Patients Diagnosed Before and After 2002**

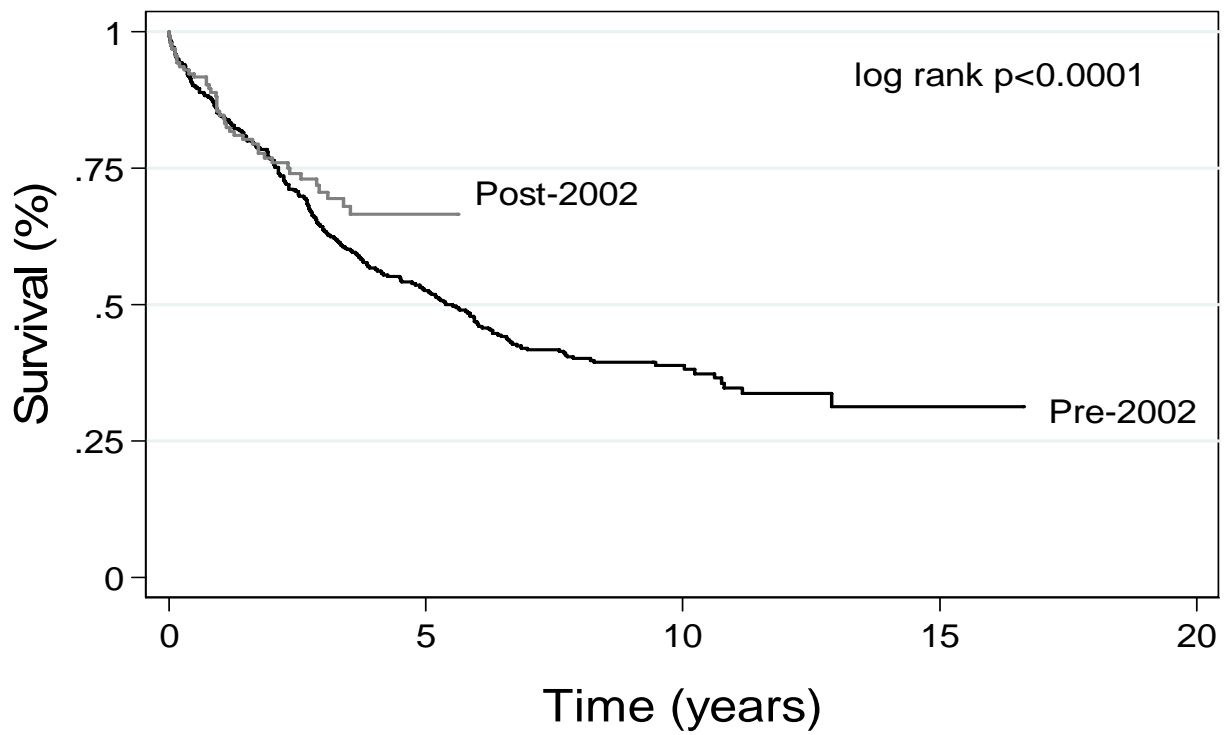

Number at risk

|           |     |     |    |   |   |
|-----------|-----|-----|----|---|---|
| Pre-2002  | 386 | 203 | 58 | 6 | 0 |
| Post-2002 | 159 | 14  | 0  | 0 | 0 |
