# Supplementary material
Source: PubMed Central journal article supplement (PMC8782564)
Supplement: NIHMS1761289-supplement-Supp_modelling.pdf [file NIHMS1761289-supplement-Supp_modelling.pdf]

# Modeling PAH Survival

Ronald A Thisted

8 September 2009

## Modeling PAH Survival

Ronald A Thisted

8 September 2009

### 1.1 Variable selection for the model

We retained the three predictors from the NIH model, both on scientific plausibility grounds and to make direct comparisons to the NIH model possible. We then considered models that, in addition to these three variables, included other variables which demonstrated statistical significance in univariate analysis: functional class, age, responder status, `tmt_time`. Variables were removed from the model one at a time, omitting at each stage the predictor showing least statistical significance, provided that the p-value exceeded 0.05.

The results for Weibull regression are shown below. Because `tmt_time` was present for only 180 of the pph patients, only those patients who had complete data on all of the considered predictors were able to be used in the first stepwise calculation ( $n = 166$ ). For that reason the stepwise calculations were repeated omitting `tmt_time` (which was not statistically significant), which brought the number of patients with full data on the predictors to 242. In each case, only the three NIH variables were retained, and all were statistically significant in the larger dataset.

```
[1.1] . stepwise, pr(.05): streg (cath_meanpa cath_rap cath_ci) (fc2-fc4) tmt_time age responder if pph==1
> , d(weibull) nohr nolog
                                begin with full model
p = 0.9801 >= 0.0500  removing responder
p = 0.7375 >= 0.0500  removing tmt_time
p = 0.4477 >= 0.0500  removing fc2 fc3 fc4
p = 0.5284 >= 0.0500  removing age
```

Weibull regression -- log relative-hazard form

```
No. of subjects =          166                Number of obs   =          166
No. of failures =           79
Time at risk    =  935.0554443
Log likelihood  = -187.94323
LR chi2(3)     =          13.97
Prob > chi2    =          0.0029
```

|             | _t | Coef.     | Std. Err. | z     | P> z  | [95% Conf. Interval] |
|-------------|----|-----------|-----------|-------|-------|----------------------|
| cath_meanpa |    | -.0182095 | .0097154  | -1.87 | 0.061 | -.0372514 .0008324   |
| cath_rap    |    | .0518079  | .0212385  | 2.44  | 0.015 | .0101813 .0934345    |
| cath_ci     |    | -.3568947 | .2421836  | -1.47 | 0.141 | -.8315658 .1177764   |
| _cons       |    | -1.45386  | .9366488  | -1.55 | 0.121 | -3.289658 .3819375   |
| /ln_p       |    | .0646305  | .0967931  | 0.67  | 0.504 | -.1250805 .2543415   |

| p   |  | 1.066765 | .1032555 |          |
|-----|--|----------|----------|----------|
| 1/p |  | .9374138 | .0907352 |          |
|     |  |          |          | .8824258 |
|     |  |          |          | 1.289612 |
|     |  |          |          | .775427  |
|     |  |          |          | 1.13324  |

```
[1.2] . stepwise, pr(.05): streg (cath_meanpa cath_rap cath_ci) (fc2-fc4) age responder if pph==1, d(weibu
> ll) nohr nolog
note: 1 obs. dropped because of estimability
      begin with full model
p = 0.5776 >= 0.0500 removing age
p = 0.5629 >= 0.0500 removing fc2 fc3 fc4
p = 0.0944 >= 0.0500 removing responder
```

Weibull regression -- log relative-hazard form

```
No. of subjects =      242                Number of obs   =      242
No. of failures =      124
Time at risk    = 1309.004795
Log likelihood  = -286.31185
LR chi2(3)     =      30.62
Prob > chi2    =      0.0000
```

| _t          |  | Coef.     | Std. Err. | z     | P> z  | [95% Conf. Interval] |
|-------------|--|-----------|-----------|-------|-------|----------------------|
| cath_meanpa |  | -.0181536 | .0077142  | -2.35 | 0.019 | -.0332732 -.003034   |
| cath_rap    |  | .0587078  | .0163051  | 3.60  | 0.000 | .0267503 .0906653    |
| cath_ci     |  | -.4198789 | .1838869  | -2.28 | 0.022 | -.7802906 -.0594672  |
| _cons       |  | -1.291735 | .7078433  | -1.82 | 0.068 | -2.679082 .0956124   |
| /ln_p       |  | .0284513  | .0771618  | 0.37  | 0.712 | -.1227831 .1796857   |
| p           |  | 1.02886   | .0793887  |       |       | .8844555 1.196841    |
| 1/p         |  | .9719496  | .0749974  |       |       | .8355328 1.130639    |

## 1.2 Adequacy of the Weibull model

If the Weibull model fits well, then the cumulative hazard function ( $-\ln(S(t))$ ) should be a linear function of time. The Cox proportional hazard model can be used to estimate the underlying hazard function, adjusted for covariates, nonparametrically, and this estimate can be used to assess linearity (and hence, adequacy of the Weibull model).

The diagnostic plot of Figure 1.1 is quite straight, at least up to ten years. About 80% of the patients' information is complete by ten years, so we can repeat the exercise, censoring values at ten years. The resulting diagnostic plot shows a very straight line (Figure 1.2), indicating excellent

agreement with the Weibull model. One could argue that the data set is mature through ten years, but has limited information about survival beyond the ten-year point, in which case the model could be based on the censored ten-year data. [Note that this does not discard the information from those who survive beyond ten years; their information up to the ten-year point is fully included.]

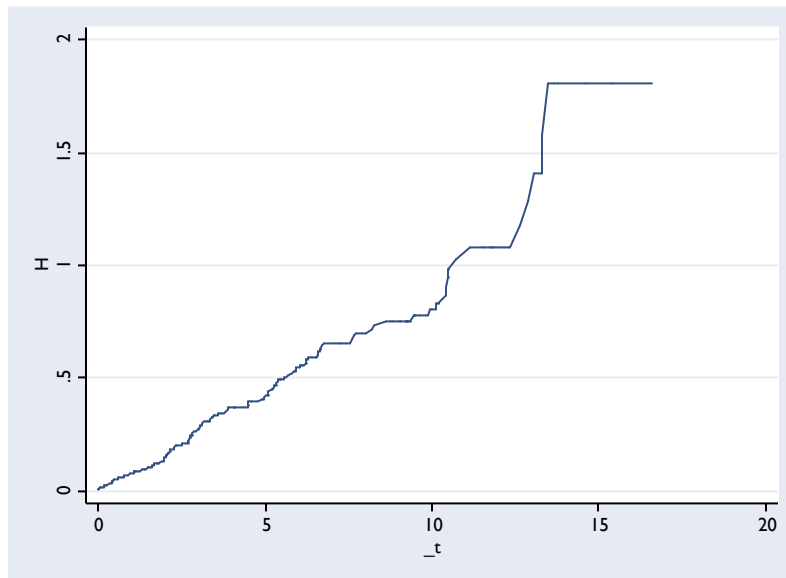

Figure 1.1: Cumulative hazard vs time, full dataset.

The Weibull model based on the full data set is not strikingly different from that based on censoring at ten years. The output for the two settings are contrasted below, starting with the full data set model.

```
[1.3] . streg cath_meanpa cath_rap cath_ci if pph==1, d(weibull) nohr nolog

        failure _d: mortality
        analysis time _t: stimeyears

Weibull regression -- log relative-hazard form

No. of subjects =          246                Number of obs   =          246
No. of failures =           127                LR chi2(3)         =          25.35
Time at risk    = 1331.674199                Prob > chi2        =          0.0000
Log likelihood  = -294.27028

-----
        _t |      Coef.   Std. Err.      z    P>|z|     [95% Conf. Interval]
```

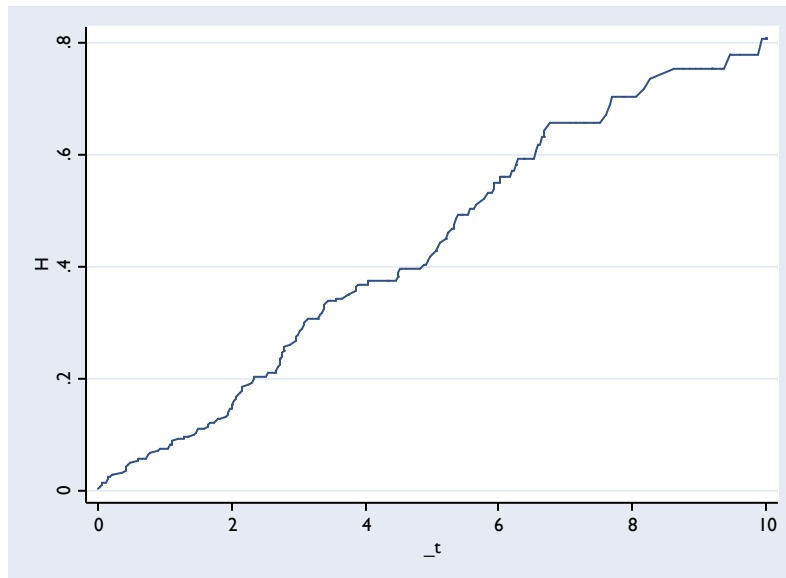

Figure 1.2: Cumulative hazard vs time, data points beyond 10 years are censored.

|             |  |           |          |       |       |           |           |
|-------------|--|-----------|----------|-------|-------|-----------|-----------|
| cath_meanpa |  | -.0131682 | .0072487 | -1.82 | 0.069 | -.0273754 | .001039   |
| cath_rap    |  | .0449203  | .014784  | 3.04  | 0.002 | .0159442  | .0738964  |
| cath_ci     |  | -.3695832 | .1810877 | -2.04 | 0.041 | -.7245085 | -.0146579 |
| _cons       |  | -1.48393  | .7033466 | -2.11 | 0.035 | -2.862464 | -.1053964 |
| -----       |  |           |          |       |       |           |           |
| /ln_p       |  | .0212581  | .0764031 | 0.28  | 0.781 | -.1284891 | .1710053  |
| -----       |  |           |          |       |       |           |           |
| p           |  | 1.021486  | .0780446 |       |       | .8794231  | 1.186497  |
| 1/p         |  | .9789663  | .074796  |       |       | .8428171  | 1.137109  |
| -----       |  |           |          |       |       |           |           |

The ten-year censored version is given here.

```
[1.4] . streg cath_meanpa cath_rap cath_ci if pph==1, d(weibull) nohr nolog

      failure _d: die10
      analysis time _t: st10

Weibull regression -- log relative-hazard form

No. of subjects =          247          Number of obs   =          247
No. of failures =          115
```

Time at risk = 1274.505136  
 LR chi2(3) = 21.94  
 Log likelihood = -291.13584  
 Prob > chi2 = 0.0001

| _t          | Coef.     | Std. Err. | z     | P> z  | [95% Conf. Interval] |
|-------------|-----------|-----------|-------|-------|----------------------|
| cath_meanpa | -.0142354 | .0077288  | -1.84 | 0.065 | -.0293836 .0009128   |
| cath_rap    | .0448934  | .0154911  | 2.90  | 0.004 | .0145314 .0752554    |
| cath_ci     | -.3360315 | .1881666  | -1.79 | 0.074 | -.7048313 .0327683   |
| _cons       | -1.422101 | .7332648  | -1.94 | 0.052 | -2.859273 .0150721   |
| /ln_p       | -.0448648 | .0825665  | -0.54 | 0.587 | -.2066922 .1169626   |
| p           | .9561267  | .0789441  |       |       | .8132699 1.124077    |
| 1/p         | 1.045886  | .0863552  |       |       | .8896184 1.229604    |

### 1.3 Effects of covariates

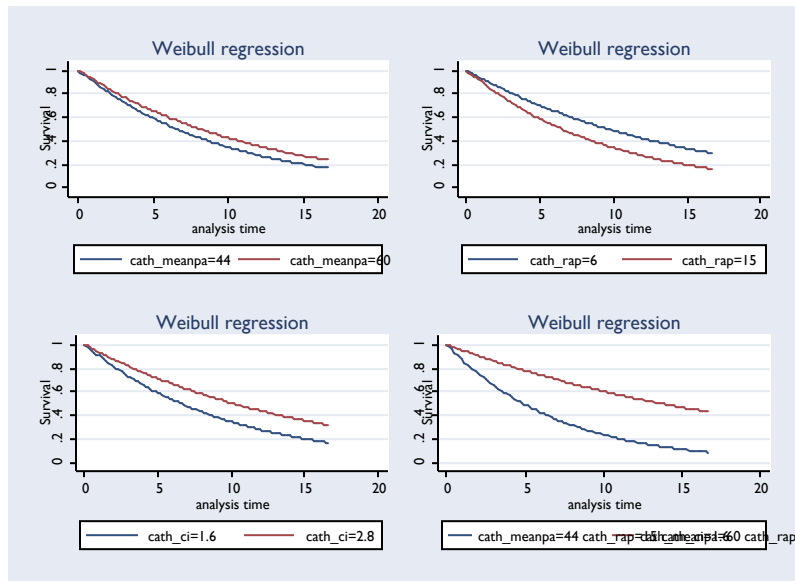

Figure 1.3: Effects of covariates on survival predictions from the Weibull model.

Figure 1.3 shows the results of varying each of the three covariates from the observed 25th percentile to the 75th percentile on predicted survival. The first three panels show the effects for

each of the covariates when the other two covariates are at their mean values. The final panel contrasts predicted survival for a patient whose mPAP and CI are at the 25th percentile and mRAP is at the 75th percentile to that of a patient at the 75th percentile of mPAP and CI and 25th percentile of mRAP.

## 1.4 A further simplification

In both cases above (full or ten-year-censored), the Weibull shape parameter ( $p$ ) is very close to one, and in neither case is statistically significantly different from one. In that case, the Weibull model simplifies to an *exponential regression* model, which is substantially simpler to use. The results for the ten-year-censoring dataset are given below, and it is clear that the coefficients are almost identical to those from the Weibull model above.

```
[1.5] . streg cath_meanpa cath_rap cath_ci if pph==1, d(exponential) nohr nolog

        failure _d:  die10
        analysis time _t:  st10

Exponential regression -- log relative-hazard form

No. of subjects =          247                Number of obs   =          247
No. of failures =           115
Time at risk    = 1274.505136

Log likelihood  = -291.28622                LR chi2(3)         =          22.34
                                                Prob > chi2        =          0.0001

-----+-----
          _t |          Coef.   Std. Err.      z    P>|z|     [95% Conf. Interval]
-----+-----
cath_meanpa |  -.0143122   .0077052   -1.86  0.063   - .0294142   .0007897
cath_rap    |   .0451561   .0154697    2.92  0.004    .0148361   .0754761
cath_ci     |  -.3377175   .1879646   -1.80  0.072   - .7061214   .0306865
   _cons    |  -1.498452   .7201019   -2.08  0.037   -2.909826   -.0870785
-----+-----
```

This model would estimate survival at  $t$  years by

$$P(t) = e^{-A(x,y,z) \times t},$$

where  $A(x, y, z) = e^{(-1.498 - 0.0143x + 0.0452y - 0.338z)}$ , and where  $x$ ,  $y$ , and  $z$  are mPAP, mRAP, and CI, respectively.

For the example in the paper (mPAP of 40 mm Hg, mRAP of 3 mm Hg, and CI of 3.5 L/min/m<sup>2</sup>), the exponential-regression estimates using the mature portion of the data set give 1-, 2-, 3-, 5-, and 10-year survival probabilities of 0.96, 0.92, 0.88, 0.80, and 0.64. [The exponential model using the full data set gives the same estimated probabilities to this number of decimal places, as does the more complex Weibull model.]

## 1.5 The Cox model

For comparison purposes, the Cox proportional hazard estimates of the effects of the predictor variables are virtually identical to those from the Weibull or exponential models, as shown below.

```
[1.6] . stcox cath_meanpa cath_rap cath_ci if pph==1, nohr nolog

          failure _d:  die10
          analysis time _t:  st10

Cox regression -- Breslow method for ties

No. of subjects =          247                Number of obs   =          247
No. of failures =           115
Time at risk    = 1274.505136

Log likelihood  = -566.55844                LR chi2(3)         =          21.22
                                                Prob > chi2       =          0.0001

-----+-----
          _t |          Coef.   Std. Err.      z    P>|z|     [95% Conf. Interval]
-----+-----
cath_meanpa |  -.0143476   .0077374    -1.85  0.064    - .0295126   .0008174
cath_rap    |   .0427519   .0154703     2.76  0.006     .0124307   .0730731
cath_ci     |  -.3456571   .1879657    -1.84  0.066    - .714063   .0227488
-----+-----
```

## 1.6 Responders to calcium channel blockers

There are 11 responders among the pph patients, and only one of them died during the course of the study. As a result, there is little information about factors that would influence their survival. The Kaplan-Meier curves are shown in Figure 1.4 for responders and non-responders.

If we include the `responder` variable, which is not quite statistically significant, but which has a large coefficient in the model, we have the following estimates:

```
[1.7] . streg cath_meanpa cath_rap cath_ci responder if pph==1, d(e) nohr nolog

          failure _d:  mortality
          analysis time _t:  stimeyears

Exponential regression -- log relative-hazard form

No. of subjects =          246                Number of obs   =          246
No. of failures =           127
Time at risk    = 1331.674199
```





where

$$A(x, y, z) = e^{(-1.270 - 0.0148x + 0.0402y - 0.361z)} \quad (1.2)$$

for non-responders to calcium channel blockers and

$$A(x, y, z) = e^{(-3.012 - 0.0148x + 0.0402y - 0.361z)} \quad (1.3)$$

for responders, and where once again  $x$ ,  $y$ , and  $z$  are mPAP, mRAP, and CI, respectively.

This model fits the data well, and the exponential distribution also approximates the data well, as noted above. The appropriateness of incorporating the **responder** variable in the model as a “hazard adjustment” is justified by testing the proportional-hazards assumption, both overall and for each of the individual predictors. [Note that the exponential regression model is a proportional-hazards model.] As shown in the display below, there is no evidence to reject the proportional-hazards assumption for any of the predictors. Specifically, the p-value for the **responder** adjustment in this model is 0.57, which is quite consistent with **responder** status operating to multiply the hazard by a constant amount.

```
[1.8] . quietly stset stime, fail(mortality)
      . quietly stcox cath_meanpa cath_rap cath_ci responder if pph==1,
          scaledsch(a b c d) sch(e f g h) nohr nolog
      . estat phtest, detail
```

Test of proportional-hazards assumption

Time: Time

|             | rho      | chi2 | df | Prob>chi2 |
|-------------|----------|------|----|-----------|
| cath_meanpa | 0.05312  | 0.23 | 1  | 0.6313    |
| cath_rap    | 0.10700  | 1.57 | 1  | 0.2103    |
| cath_ci     | -0.04486 | 0.26 | 1  | 0.6097    |
| responder   | -0.05003 | 0.32 | 1  | 0.5733    |
| global test |          | 5.24 | 4  | 0.2633    |
