# Supplementary material
Source: PubMed Central journal article supplement (PMC8782564)
Supplement: NIHMS1761289-supplement-supp_Table_1.pdf [file NIHMS1761289-supplement-supp_Table_1.pdf]

---

**Supplemental Table I: Inclusion and Exclusion Criteria of the Study Cohort**

---

**Inclusion Criteria:**

1. Age  $\geq 18$  years at the time of diagnosis
2. WHO category I pulmonary arterial hypertension
3. Mean pulmonary arterial pressure  $>25$  mmHg at rest or  $>30$  mmHg during exercise with a pulmonary capillary wedge pressure  $<15$  mmHg

**Exclusion Criteria:**

1. WHO category II pulmonary venous hypertension diagnosed by pulmonary capillary wedge pressure  $>15$  mm Hg
  2. Obstructive lung disease diagnosed by reduced expiratory flow rates (forced expiratory volume in one second/forced vital capacity  $<70\%$  predicted)
  3. More than mild interstitial lung disease diagnosed by typical appearance on computed tomography
  4. Chronic pulmonary thromboembolic disease diagnosed by ventilation perfusion scan (other than normal or low probability), contrast-enhanced chest computed tomography or pulmonary angiography if necessary
  5. Pulmonary hypertension associated with sarcoidosis and other infiltrative diseases.
  6. Patients who were on endothelin receptor antagonists, phosphodiesterase inhibitors, or prostacyclins at the time of referral
  7. Patients diagnosed with WHO category I pulmonary arterial hypertension before 1991
-
