# Supplementary material
Source: PubMed Central journal article supplement (PMC8782564)
Supplement: NIHMS1761289-supplement-supp_Table_2.pdf [file NIHMS1761289-supplement-supp_Table_2.pdf]

**Supplemental Table II: Baseline Pulmonary Function Test, Imaging and Echocardiographic Characteristics of the Study**

**Cohort**

| <b>Characteristics</b>                           | <b>All PAH<br/>( N=576 )</b> | <b>Subgroup<sup>†</sup><br/>( N=282 )</b> |
|--------------------------------------------------|------------------------------|-------------------------------------------|
| <b>Pulmonary function test, % predicted</b>      | <b>(N=466)</b>               | <b>(N=233)</b>                            |
| • Forced expiratory volume (n)                   | 76 ± 19 (457)                | 80±18 (230)                               |
| • Forced vital capacity (n)                      | 78 ± 18 (455)                | 84±17 (230)                               |
| • FEV1/FVC (n)                                   | 89 ± 13 (311)                | 89±13 (149)                               |
| • Total lung capacity (n)                        | 88 ± 20 (419)                | 94±17 (206)                               |
| • Diffusion lung capacity of carbon monoxide (n) | 55 ± 23 (409)                | 63±22 (197)                               |
| <b>CT chest<sup>‡</sup></b>                      | <b>(N=306)</b>               | <b>(N=132)</b>                            |
| • Normal, n (%)                                  | 213 (70)                     | 111 (84)                                  |
| • Interstitial lung disease, n (%)               | 59 (19)                      | 7 (5)                                     |
| • Thromboembolism, n (%)                         | 5 (2)                        | 3 (2)                                     |
| • Other, n (%)                                   | 29 (9)                       | 11 (9)                                    |
| <b>Ventilation/Perfusion scan</b>                | <b>(N=419)</b>               | <b>(N=221)</b>                            |

|                                                    |                |                |
|----------------------------------------------------|----------------|----------------|
| • Normal, n (%)                                    | 321 (77)       | 164 (74)       |
| • Mottled, n (%)                                   | 85 (20)        | 50 (23)        |
| • Intermediate-high probability, n (%)             | 13 (3)         | 7 (3)          |
| <b>Echocardiography</b>                            | <b>(N=510)</b> | <b>(N=248)</b> |
| • Ejection Fraction                                | 60±10 (284)    | 60±9 (127)     |
| • Left atrial enlargement, n (%)                   | 112 (22)       | 36 (15)        |
| • Right atrial enlargement, n (%)                  | 437 (86)       | 222 (91)       |
| • Right ventricular hypertrophy, n (%)             | 232 (45)       | 118 (48)       |
| • Tricuspid regurgitation, m <sup>2</sup> /sec (n) | 4.1±0.9 (246)  | 4.2±0.8 (122)  |

---

PAH = pulmonary arterial hypertension, FEV1 = forced expiratory volume in one second, and FVC = forced vital capacity

† = subgroup includes patients with idiopathic, familial, and anorexigen-associated pulmonary arterial hypertension

‡ = high resolution computerized tomographic scan of the chest
