# Supplementary material
Source: PubMed Central journal article supplement (PMC8782564)

**Supplemental Figure I: Comparison of Observed Survival in All PAH with and without Responders**

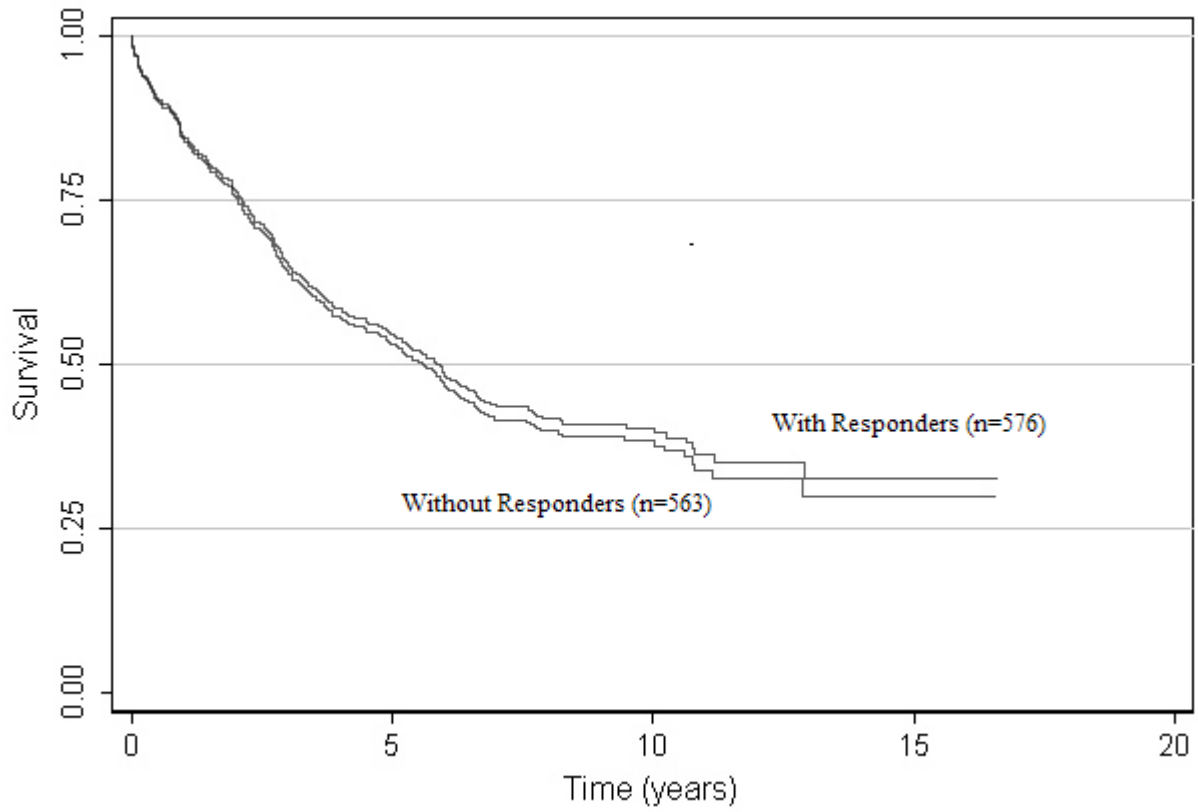

Supplement: NIHMS1761289-supplement-Supp_Fig_1.pdf [file NIHMS1761289-supplement-Supp_Fig_1.pdf]
